# Supplementary material for: Structural and Functional Insights into the Evolution of SARS-CoV-2 KP.3.1.1 Spike Protein
Source: PubMed Central journal article supplement (PMC11661143; doi:10.1101/2024.12.10.627775), 2024-12-10
Supplement: media-1.pdf [file media-1.pdf]

## Supplemental Information

### Structural and Functional Insights into the Evolution of SARS-CoV-2 KP.3.1.1 Spike Protein

Ziqi Feng<sup>1</sup>, Jiachen Huang<sup>1</sup>, Sabyasachi Baboo<sup>2</sup>, Jolene K. Diedrich<sup>2</sup>, Sandhya Bangaru<sup>1</sup>, James C. Paulson<sup>2,3</sup>, John R. Yates III<sup>2</sup>, Meng Yuan<sup>1</sup>, Ian A. Wilson<sup>1,4,\*</sup>, Andrew B. Ward<sup>1,5,\*</sup>

<sup>1</sup>Department of Integrative Structural and Computational Biology, The Scripps Research Institute, La Jolla, CA 92037, USA.

<sup>2</sup>Department of Molecular Medicine, The Scripps Research Institute, La Jolla, CA 92037, USA.

<sup>3</sup>Department of Immunology and Microbiology, The Scripps Research Institute, La Jolla, CA 92037, USA.

<sup>4</sup>The Skaggs Institute for Chemical Biology, The Scripps Research Institute, La Jolla, CA 92037, USA.

Correspondence: [wilson@scripps.edu](mailto:wilson@scripps.edu), [andrew@scripps.edu](mailto:andrew@scripps.edu)

<sup>5</sup>Lead contact: [andrew@scripps.edu](mailto:andrew@scripps.edu)

Schematic representation of the cryo-EM processing workflow in CryoSPARC (KP.3.1.1)

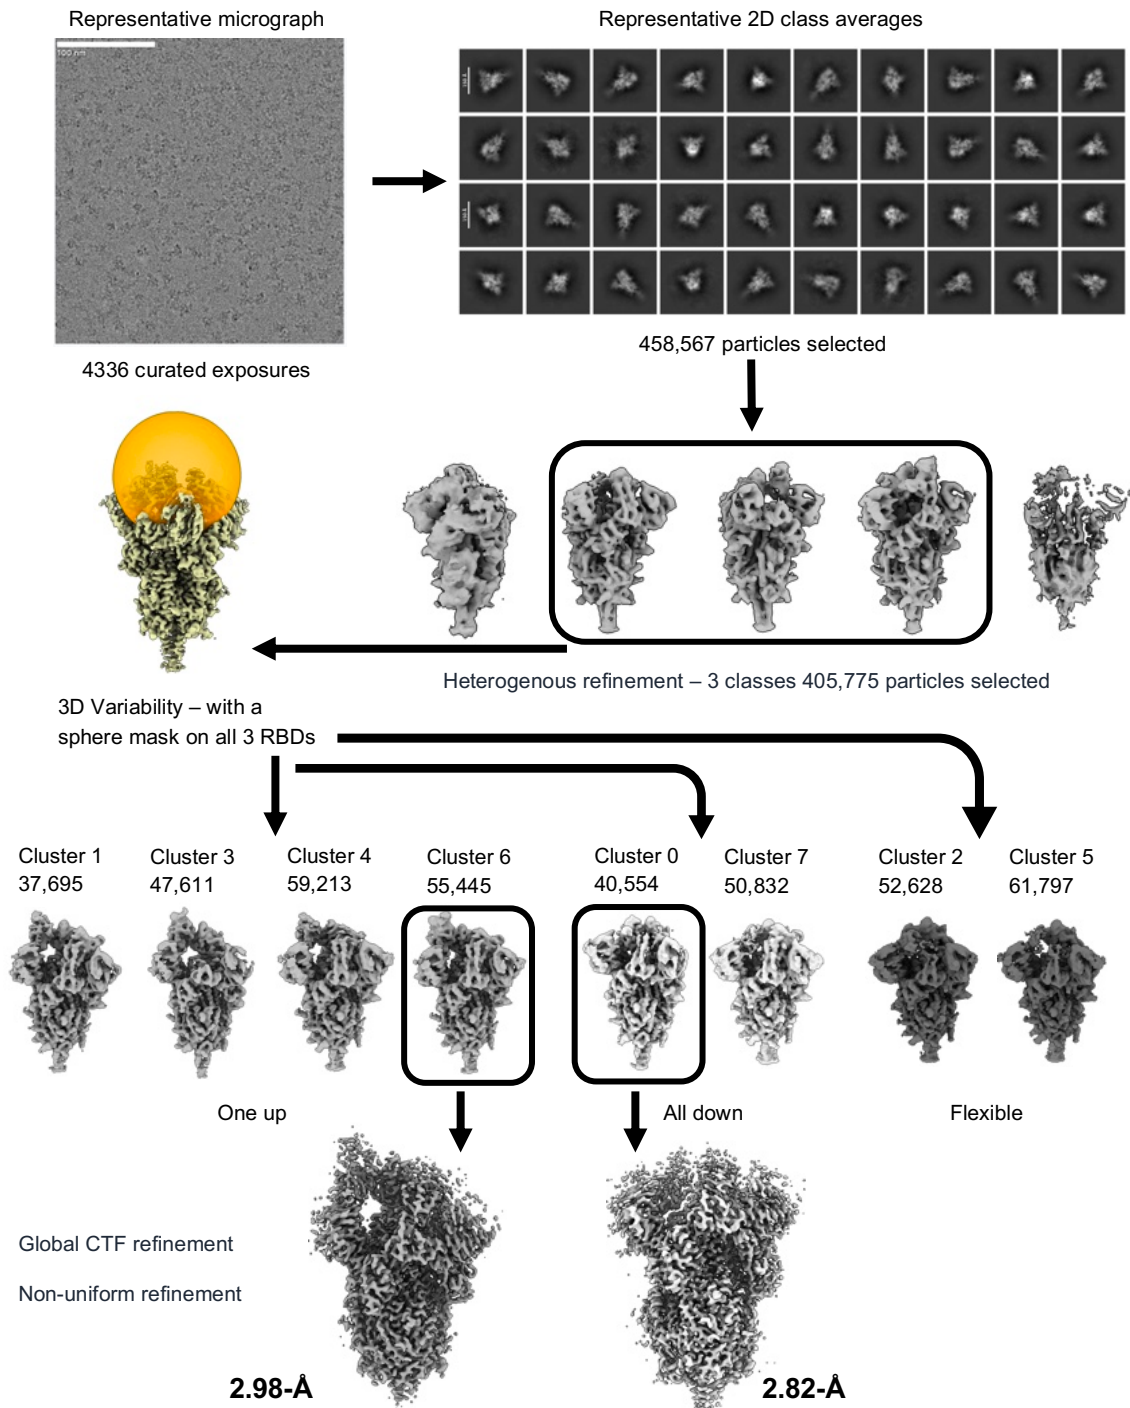

**Figure S1. Schematic representation of the cryo-EM processing workflow for SARS-CoV-2 KP.3.1.1 apo spike.** Workflow in cryoSPARC including initial processing steps (motion correction, CTF estimation, micrograph selection, particle picking, and selection based on 2D classification and heterogenous refinement) and 3D variability with a sphere mask on all three RBDs. All

particles were then separated into eight clusters and classified by their conformation. A representative map from each class underwent global CTF refinement and non-uniform refinement and was used for model building. This workflow has been applied to all datasets.

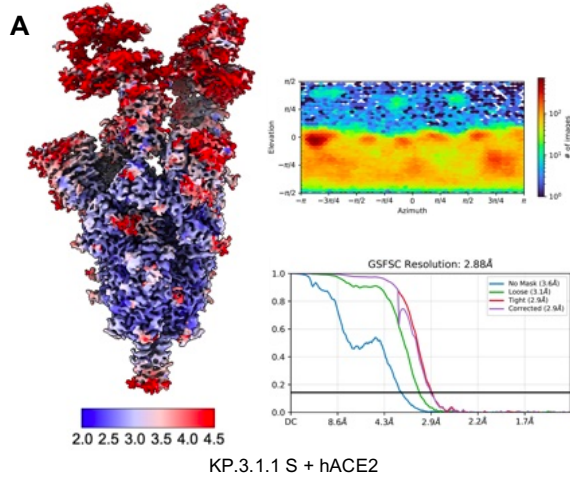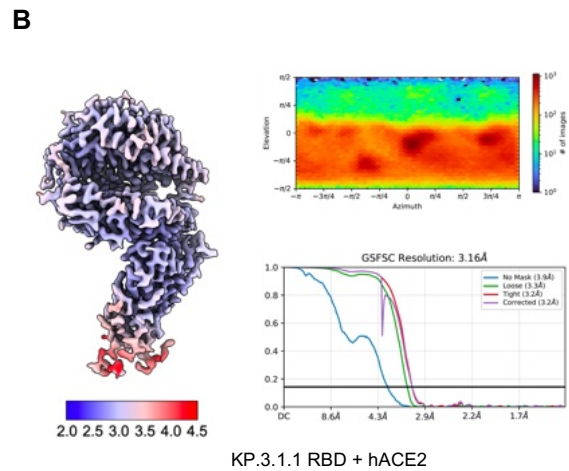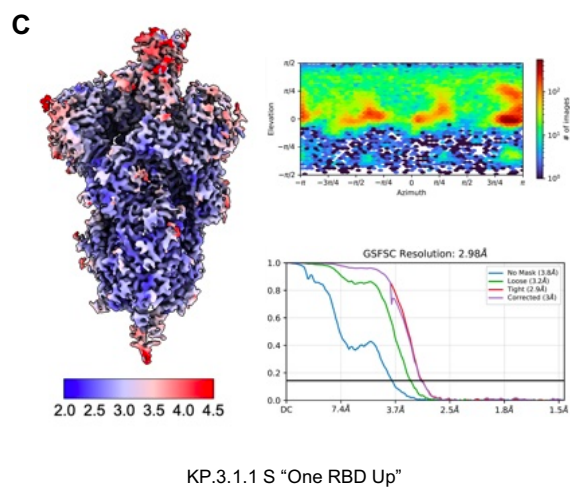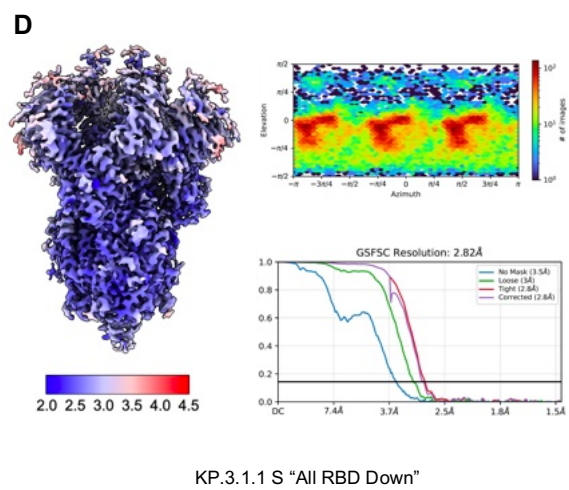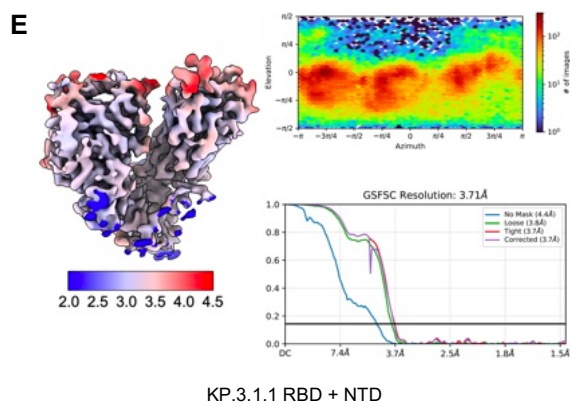

**F**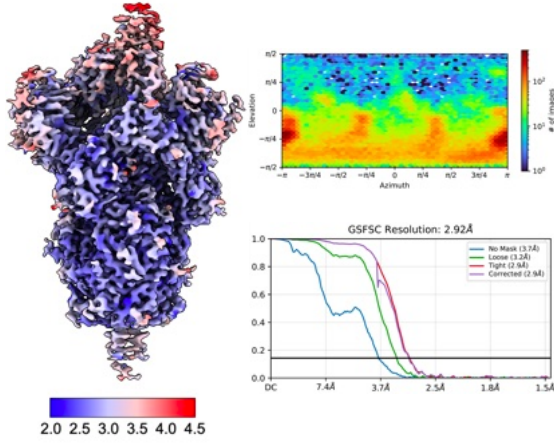

JN.1.11+S31Δ+Q493E S "One RBD Up"

**G**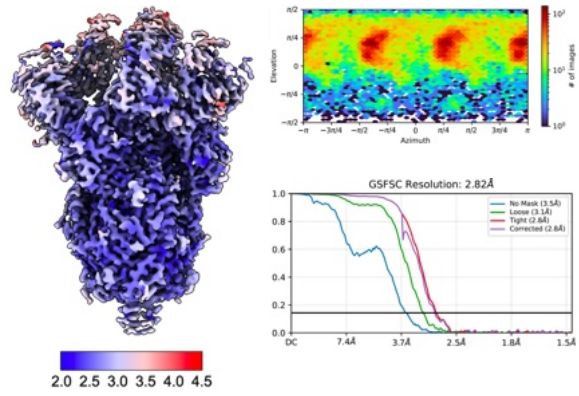

JN.1.11+S31Δ+Q493E S "All RBD Down"

**H**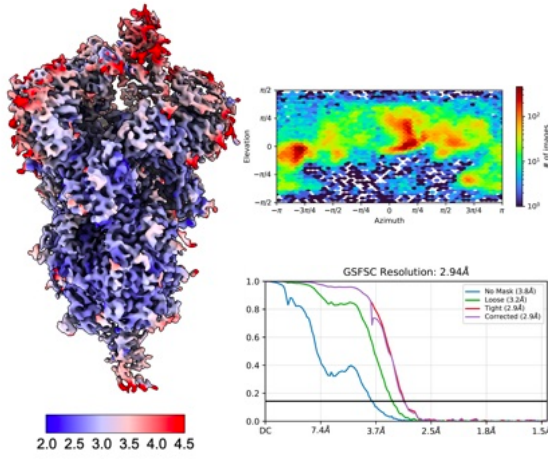

JN.1.11.1+S31Δ S "One RBD Up"

**I**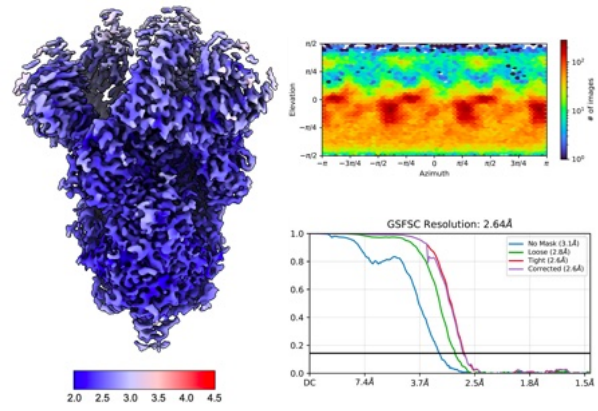

JN.1.11.1+S31Δ S "All RBD Down"

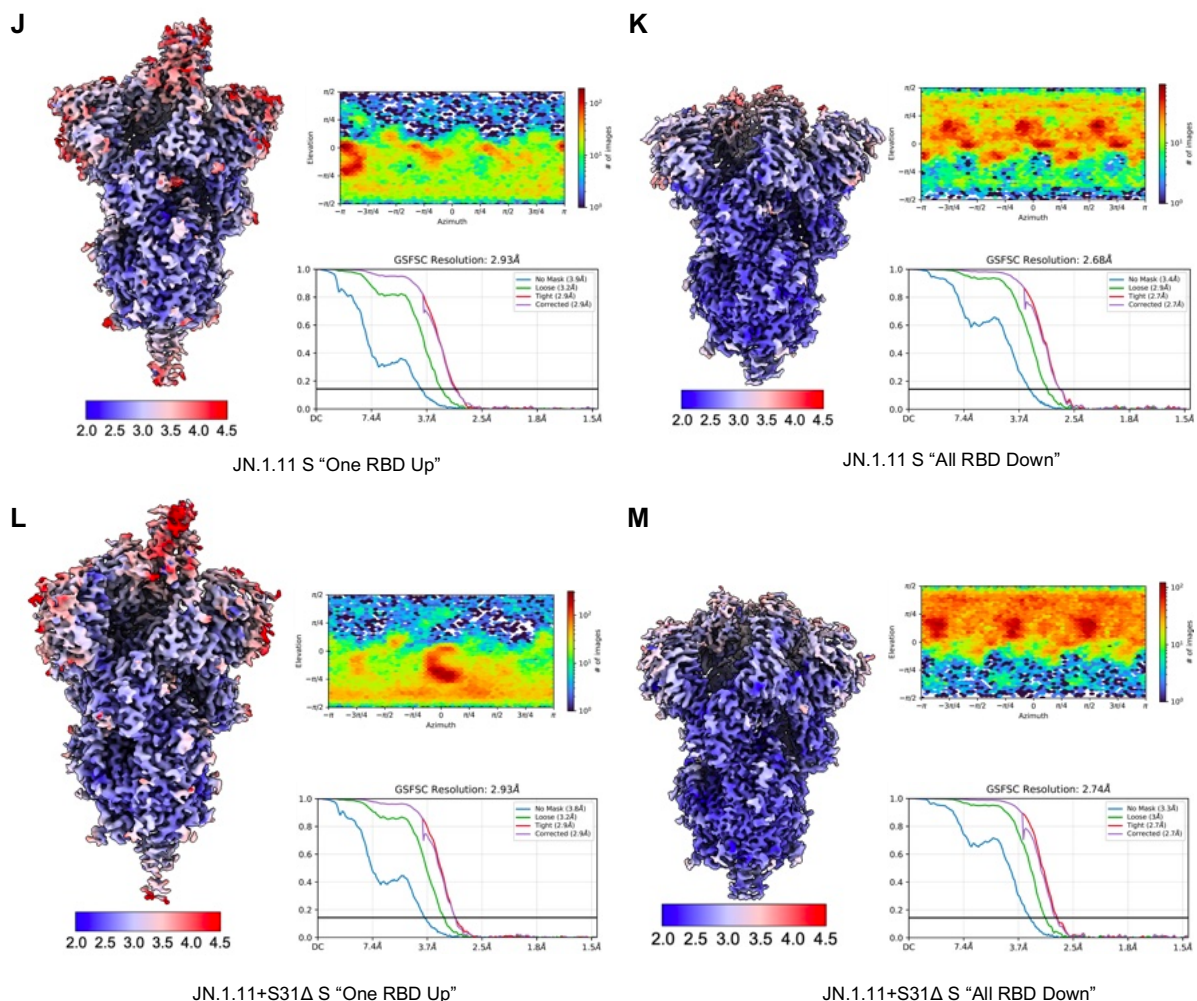

**Figure S2. Angular distribution, corresponding FSC curves, and resolution distribution of the cryo-EM map.** In the global and local resolution distribution of the cryo-EM maps, blue represents the high-resolution areas (2 Å) while red represents the low-resolution (4.5Å). (A) KP.3.1.1 S + hACE2. (B) KP.3.1.1 RBD + hACE2. (C) KP.3.1.1 S "One RBD Up". (D) KP.3.1.1 S "All RBD Down". (E) KP.3.1.1 RBD + NTD. (F) JN.1.11+S31Δ+Q493E S "One RBD Up". (G) JN.1.11+S31Δ+Q493E S "All RBD Down". (H) JN.1.11+S31Δ S "One RBD Up". (I) JN.1.11+S31 Δ S "All RBD Down". (J) JN.1.11 S "One RBD Up". (K) JN.1.11 S "All RBD Down". (L) JN.1.11+S31Δ S "One RBD Up". (M) JN.1.11+S31Δ S "All RBD Down".

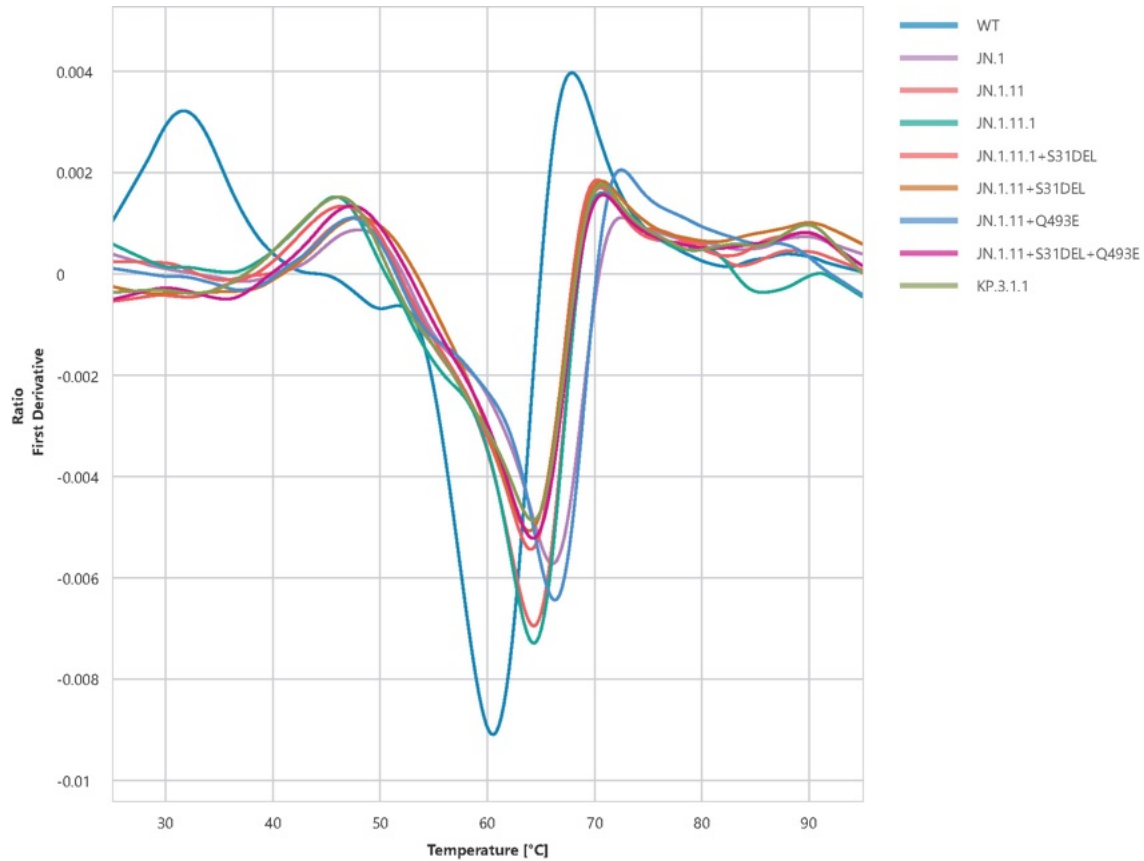

| Sample                      | T <sub>m</sub> (°C) |
|-----------------------------|---------------------|
| <b>WT</b>                   | <b>31.65</b>        |
| <b>JN.1</b>                 | <b>47.87</b>        |
| <b>JN.1.11</b>              | <b>47.59</b>        |
| <b>JN.1.11.1</b>            | <b>45.71</b>        |
| <b>JN.1.11.1+S31DEL</b>     | <b>46.46</b>        |
| <b>JN.1.11+S31DEL</b>       | <b>48.03</b>        |
| <b>JN.1.11+Q493E</b>        | <b>47.29</b>        |
| <b>JN.1.11+S31DEL+Q493E</b> | <b>47.31</b>        |
| <b>KP.3.1.1</b>             | <b>46.01</b>        |

**Figure S3. Differential scanning fluorimetry analysis of spike variant thermostability.**

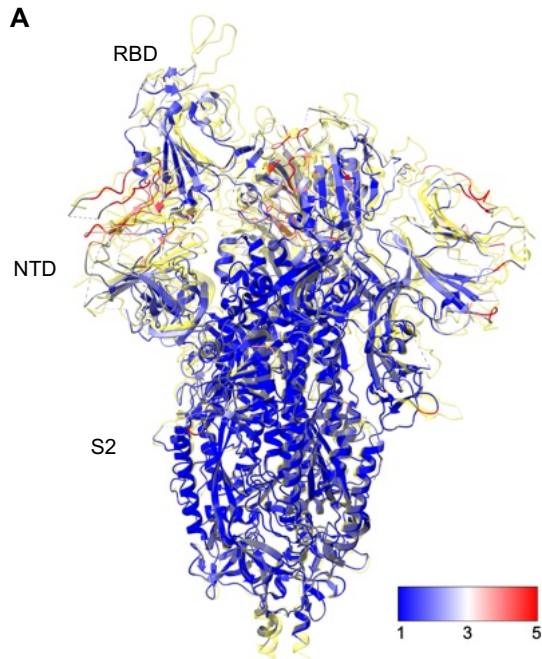

SARS-CoV-2 WT S "One RBD Up"  
(PDB ID: 6VSB) C $\alpha$  RMSD = 1.0 Å

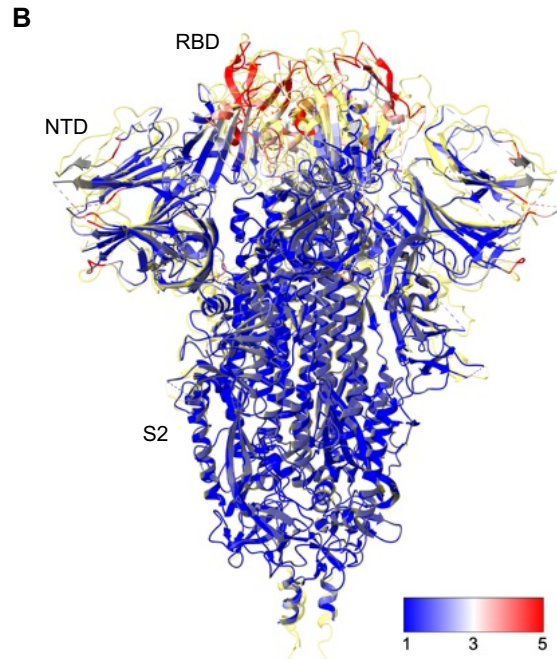

SARS-CoV-2 WT S "All RBD Down"  
(PDB ID: 6VXX) C $\alpha$  RMSD = 0.8 Å

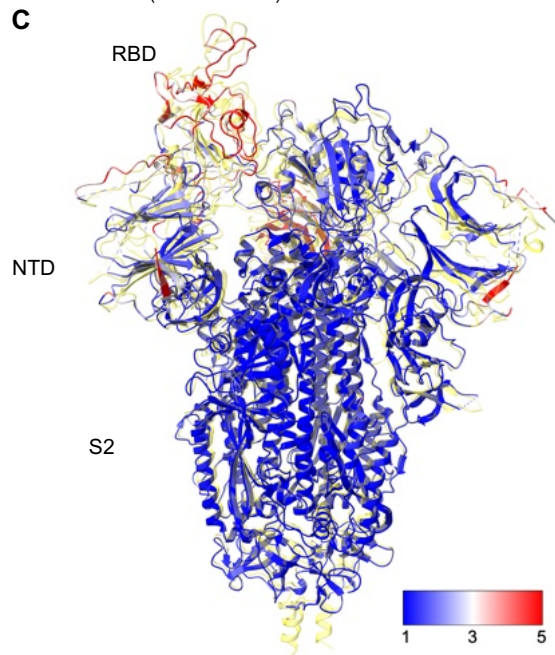

SARS-CoV-2 JN.1 S "One RBD Up"  
(PDB ID: 8Y5J) C $\alpha$  RMSD = 1.1 Å

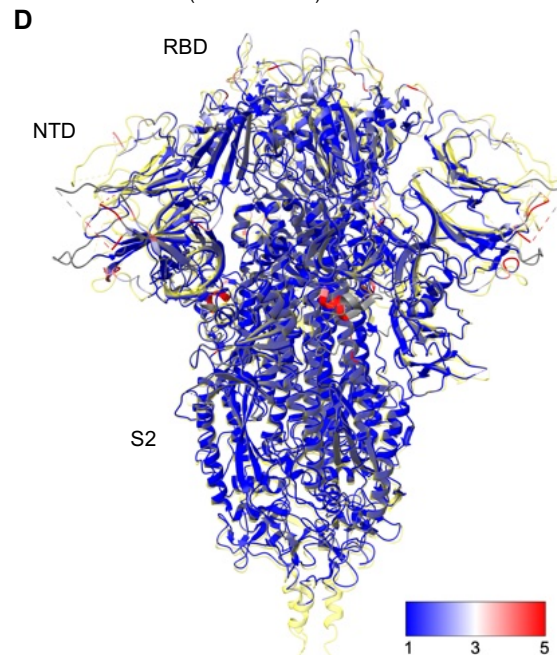

SARS-CoV-2 JN.1 S "All RBD Down"  
(PDB ID: 8X4H) C $\alpha$  RMSD = 0.9 Å



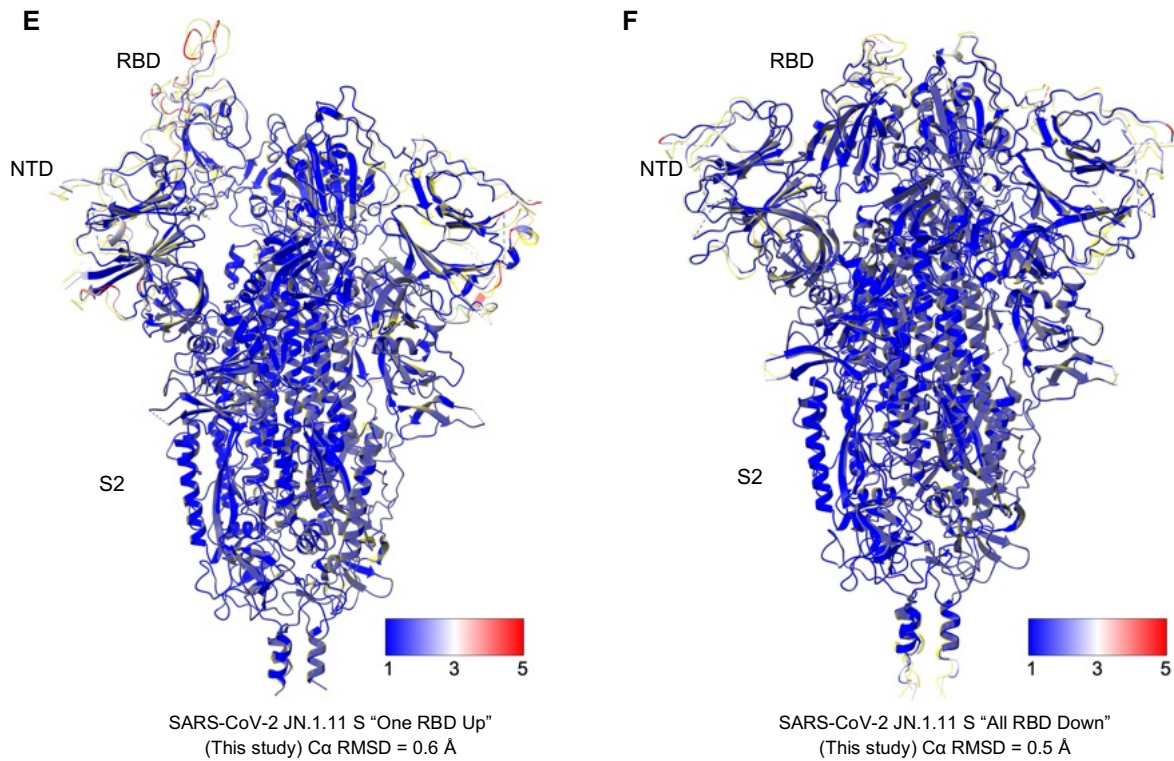

**Figure S4. Structural superimposition of SARS-CoV-2 WT, JN.1, and JN.1.11 spike protein with KP.3.1.1 spike protein.** KP.3.1.1 spike proteins are colored light yellow. Structural differences of SARS-CoV-2 WT, JN.1, and JN.1.11 spike are color-coded by their root mean square deviation (RMSD) (Å). Positions of RBD, NTD, and S2 are labeled. **(A, C, E)** Structural alignment of the KP.3.1.1 “One RBD Up” spike structure to SARS-CoV-2 WT (PDB ID: 6VSB), JN.1 (PDB ID: 8Y5J), and JN.1.11 (this study), respectively. **(B, D, F)** Structural alignment of the KP.3.1.1 “All RBD Down” spike structure to SARS-CoV-2 WT (PDB ID: 6VXX), JN.1 (PDB ID: 8X4H), and JN.1.11 (this study), respectively.

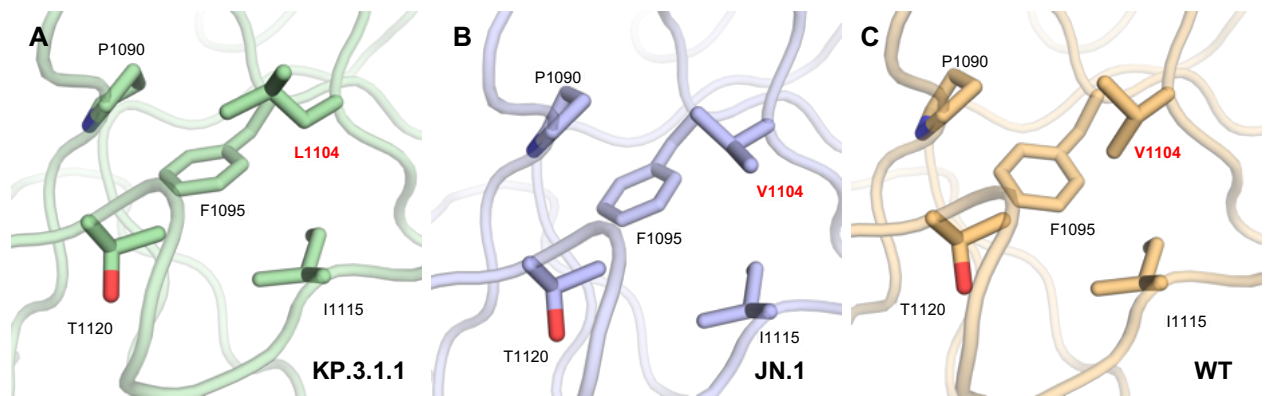

**Figure S5. Zoomed-in view of V/L1104 in WT, JN.1, and KP.3.1.1 spikes. (A-C) L1104 or V1104 is surrounded by a hydrophobic pocket formed by P1090, F1095, I1115, and T1120 in KP3.1.1, JN.1, and WT spike proteins.**

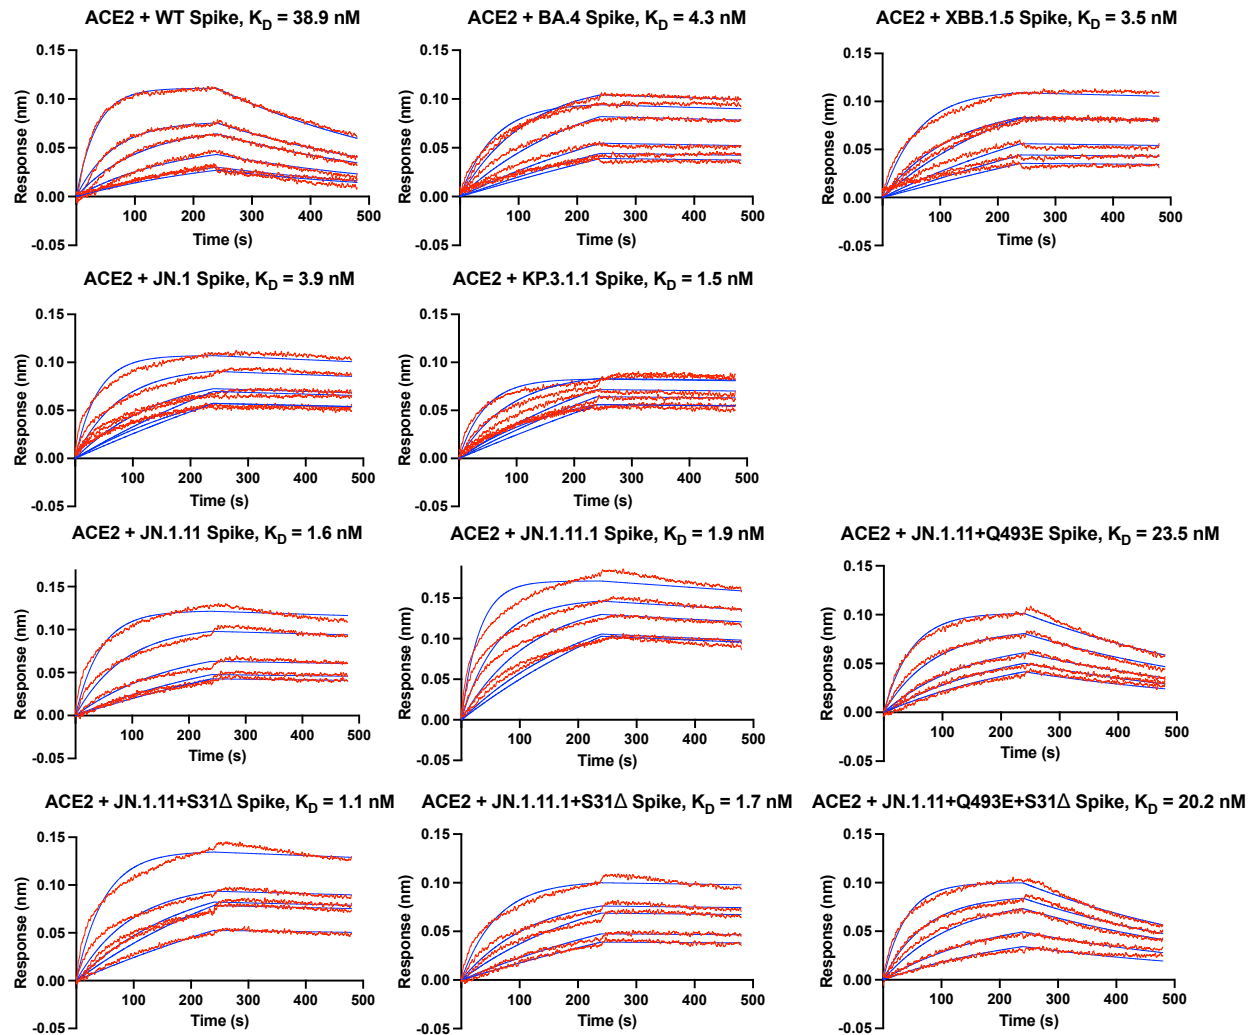

**Figure S6. Sensorgrams for binding of various spikes to hACE2, related to Fig. 4F.** Binding kinetics of different spike proteins against hACE2 were measured by biolayer interferometry (BLI). The Y-axis represents the response. Red lines represent the response curve, and blue lines represent a 1:1 binding model. Binding kinetics were measured for hACE2 concentrations (12.5, 25, 50, 100, 200, and 400 nM). Dissociation constant ( $K_D$ ) is indicated.

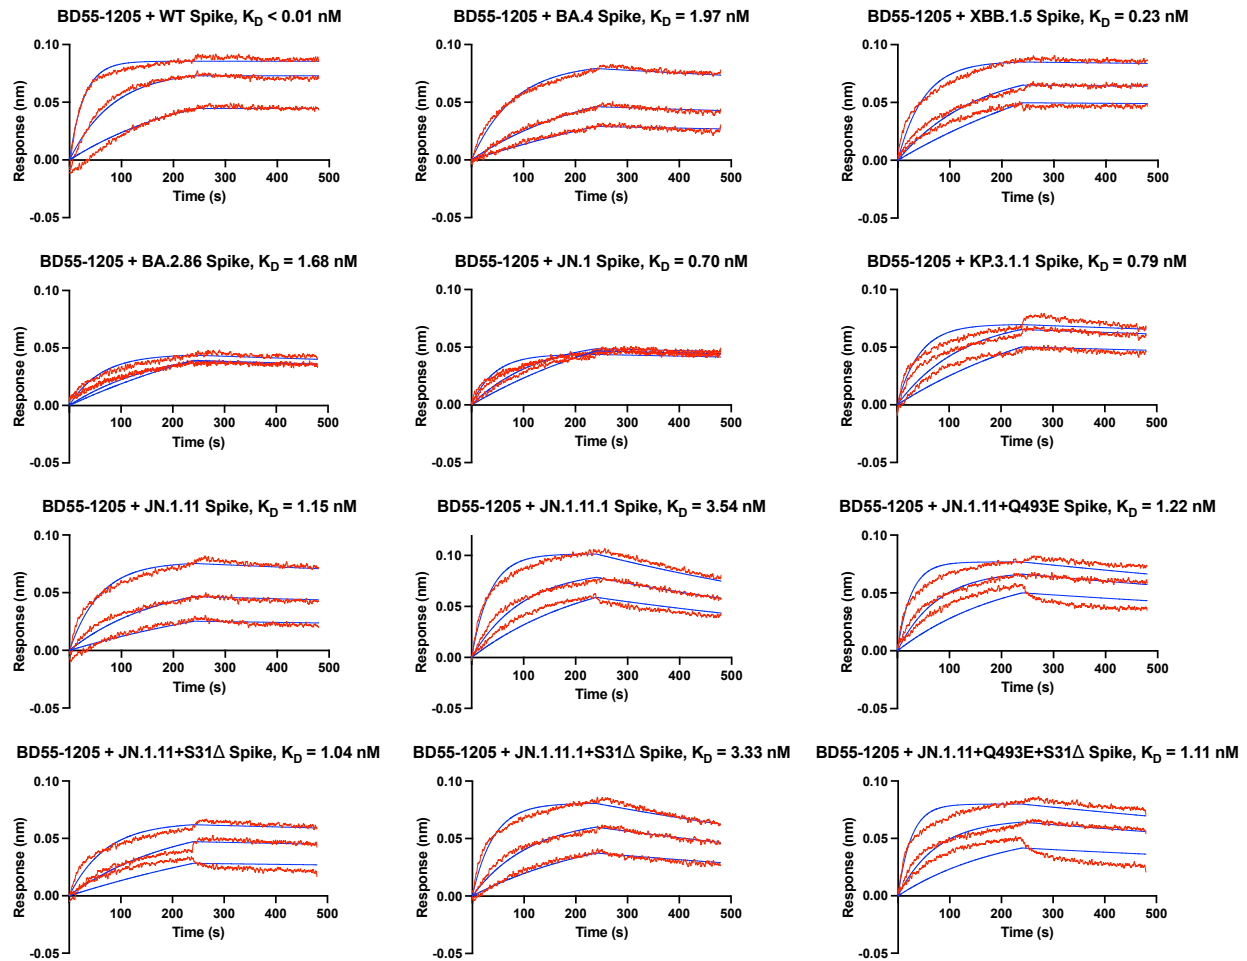

**Figure S7. Sensorgrams for binding of various spikes to BD55-1205 Fab, related to Fig. 5F.** Binding kinetics of different spike proteins against BD55-1205 Fab were measured by biolayer interferometry (BLI). The Y-axis represents the response. Red lines represent the response curve, and blue lines represent a 1:1 binding model. Binding kinetics were measured for Fab concentrations (8.33, 25, and 75 nM). Dissociation constant ( $K_D$ ) is indicated.

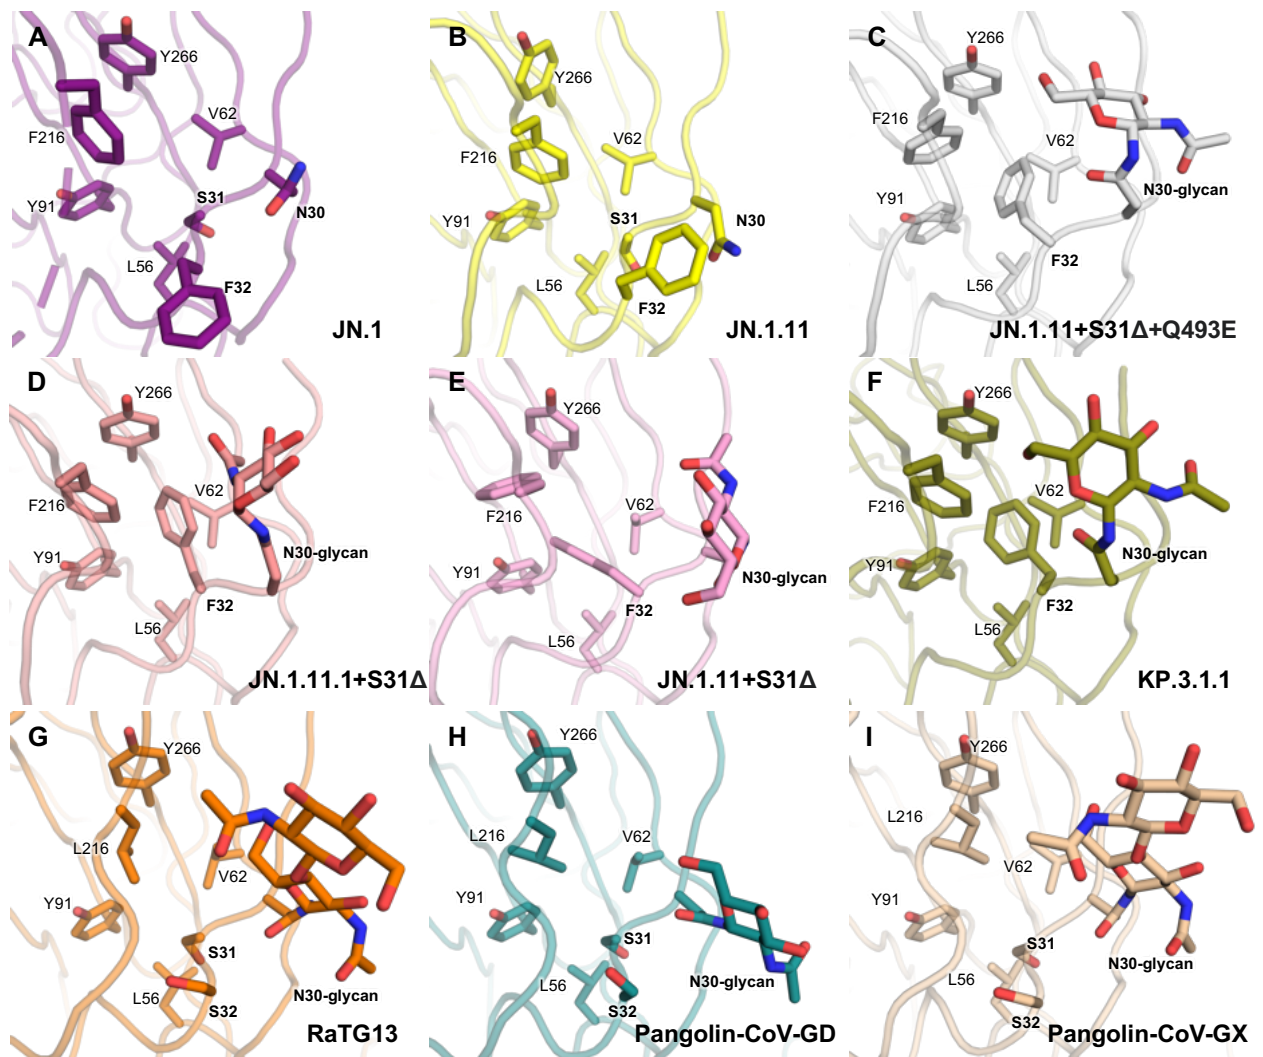

**Figure S8. Zoomed-in view of N30 in various spikes.** (A-I) Detailed side chain conformation including N30 with glycan, S31, F/S32, L56, V62, Y91, L/F216, and Y266 of JN.1 (purple), JN.1.11 (yellow), JN.1.11+S31Δ+Q493E (grey), JN.1.11.1+S31Δ (flesh), JN.1.11+S31Δ (pink), KP.3.1.1 (olive), RaTG13 (orange), Pangolin-CoV-GD (teal), and Pangolin-CoV-GX (wheat), respectively.

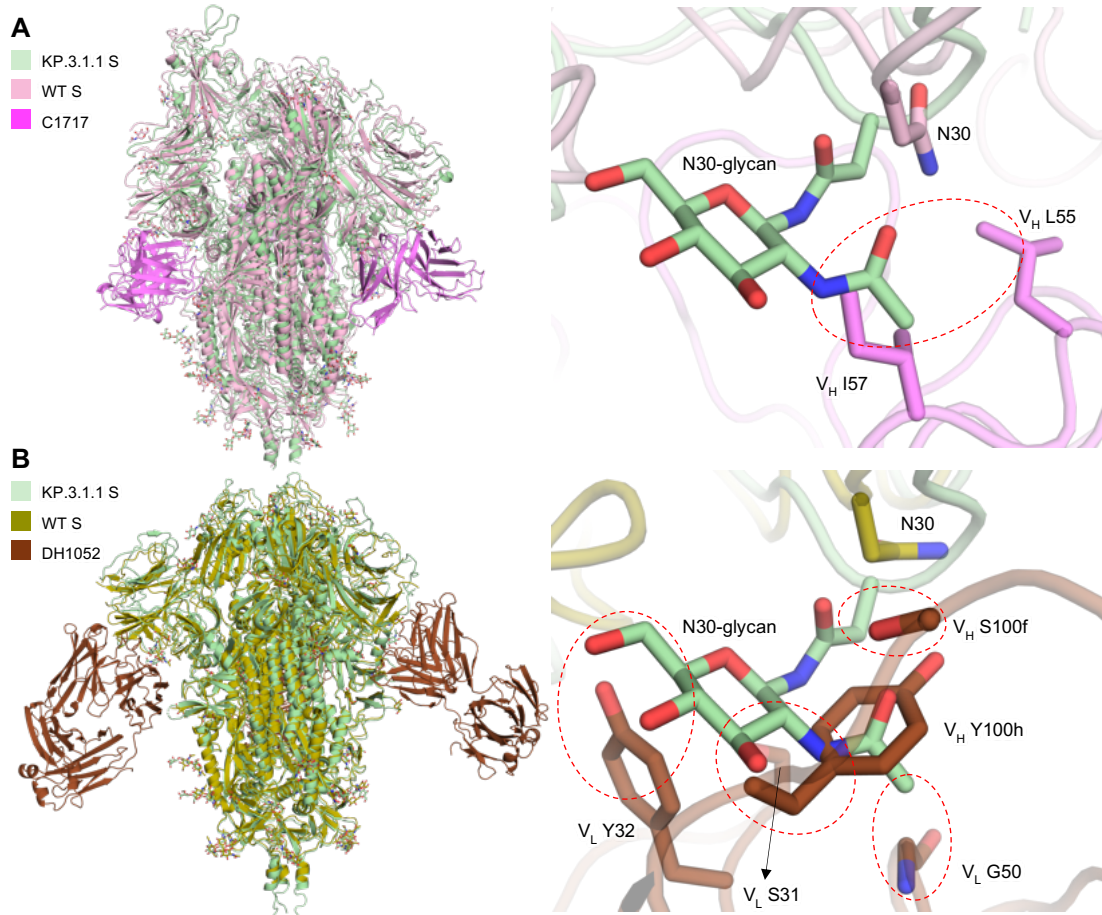

**Figure S9. Structural alignment between KP.3.1.1 S and NTD site vi antibodies.** (A) Left, superimposed structures of KP.3.1.1 S and WT S/C1717 complex. KP.3.1.1 S, WT S, and C1717 are colored in light green, pink, and magenta, respectively. Right, a zoomed-in view of the NTD shows that N30 glycan may clash with C1717 V<sub>H</sub> L55 and V<sub>H</sub> I57. The red dashed circle highlights the potential clash. (B) Right, superimposed structures of KP.3.1.1 S and WT S/DH1052 complex. KP.3.1.1 S, WT S, and DH1052 are colored in light green, olive, and brown, respectively. Right, a zoomed-in view of the NTD shows that N30 glycan may clash with DH1052 V<sub>H</sub> S100f, Y100h and V<sub>L</sub> S31, Y32, G50. Red dashed circles highlight the potential clashes.

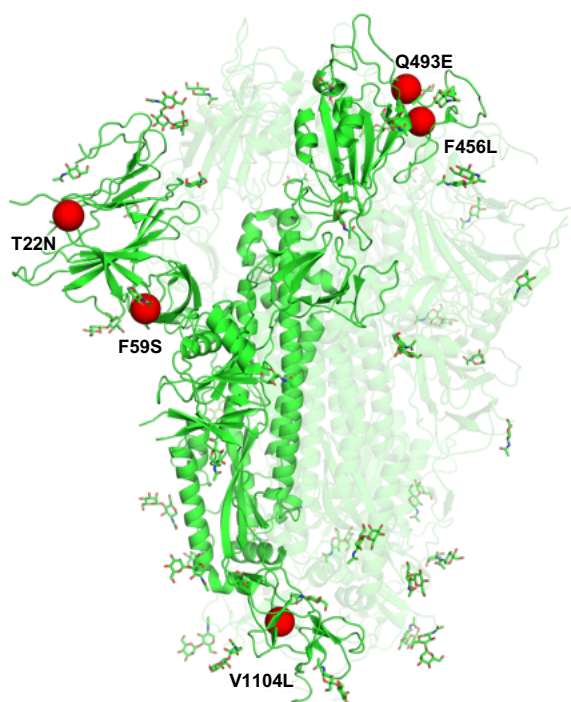

**Figure S10. Mutations (red) on XEC in the context of JN.1 S structure (green) (PDB ID: 8X4H).**

**Table S1. Cryo-EM data collection, processing, and model building statistics.**

| Sample                                       | KP.3.1.1 Spike HexaPro + hACE2 |                                | KP.3.1.1 Spike HexaPro |              |              | JN.1.11 S31del Q493E Spike HexaPro |              | JN.1.11 Spike HexaPro |              | JN.1.11 + S31del Spike HexaPro |              | JN.1.11.1+S31del Spike HexaPro |              |
|----------------------------------------------|--------------------------------|--------------------------------|------------------------|--------------|--------------|------------------------------------|--------------|-----------------------|--------------|--------------------------------|--------------|--------------------------------|--------------|
|                                              | Local refine RBD+hACE2         | Global refine S with two hACE2 | Local refine RBD+NTD   | One RBD Up   | All RBD Down | One RBD Up                         | All RBD Down | One RBD Up            | All RBD Down | One RBD Up                     | All RBD Down | One RBD Up                     | All RBD Down |
| EMDB                                         | 48146                          | 48147                          | 48148                  | 48149        | 48150        | 48151                              | 48152        | 48153                 | 48155        | 48156                          | 48157        | 48158                          | 48159        |
| PDB                                          | 9ELE                           | 9ELF                           | 9ELG                   | 9ELH         | 9ELI         | 9ELJ                               | 9ELK         | 9ELL                  | 9ELM         | 9ELN                           | 9ELO         | 9ELP                           | 9ELQ         |
| <b>Data collection &amp; processing</b>      |                                |                                |                        |              |              |                                    |              |                       |              |                                |              |                                |              |
| Microscope/ Detector                         | Glacios/Falcon4                |                                |                        |              |              |                                    |              |                       |              |                                |              |                                |              |
| Voltage (kV)                                 | 200                            |                                |                        |              |              |                                    |              |                       |              |                                |              |                                |              |
| Magnification                                | 190,000                        |                                |                        |              |              |                                    |              |                       |              |                                |              |                                |              |
| Recording mode                               | Counting                       |                                |                        |              |              |                                    |              |                       |              |                                |              |                                |              |
| Pixel size (Å)                               | 0.718                          |                                |                        |              |              |                                    |              |                       |              |                                |              |                                |              |
| Total dose (e <sup>-</sup> /Å <sup>2</sup> ) | 44.84                          |                                |                        |              |              |                                    |              |                       |              |                                |              |                                |              |
| Defocus range (µm)                           | -0.8 to -1.7                   |                                |                        |              |              |                                    |              |                       |              |                                |              |                                |              |
| No. of movie micrographs                     | 4334                           |                                | 4336                   |              |              | 4716                               |              | 3680                  |              | 4010                           |              | 7672                           |              |
| No. of molecular projection images in map    | 440,016                        | 131,224                        | 98,127                 | 55,445       | 40,554       | 94,590                             | 41,085       | 39,569                | 42460        | 63,034                         | 59,178       | 53,372                         | 112,912      |
| Symmetry                                     | C1                             | C1                             | C1                     | C1           | C3           | C1                                 | C3           | C1                    | C3           | C1                             | C3           | C1                             | C3           |
| Map pixel size (Å)                           | 0.718                          |                                |                        |              |              |                                    |              |                       |              |                                |              |                                |              |
| Map resolution (FSC 0.143; Å)                | 3.16                           | 2.88                           | 3.71                   | 2.98         | 2.82         | 2.92                               | 2.82         | 2.93                  | 2.68         | 2.93                           | 2.74         | 2.94                           | 2.64         |
| Map sharpening B-factor (Å <sup>2</sup> )    | -107.1                         | -66.1                          | -110.6                 | -58.9        | -72.6        | -65.5                              | -68.0        | -48.7                 | -62.7        | -58.2                          | -72.1        | -53.3                          | -76.2        |
| <b>Structure building and validation</b>     |                                |                                |                        |              |              |                                    |              |                       |              |                                |              |                                |              |
| Model composition                            |                                |                                |                        |              |              |                                    |              |                       |              |                                |              |                                |              |
| Non-hydrogen atoms                           | 6529                           | 35225                          | 4255                   | 25512        | 25509        | 25558                              | 25299        | 25567                 | 25275        | 25446                          | 25446        | 23543                          | 25479        |
| Protein residues                             | 780                            | 4334                           | 510                    | 3152         | 3153         | 3159                               | 3123         | 3157                  | 3117         | 3150                           | 3150         | 2916                           | 3150         |
| Ligands                                      | NAG:12/BMA:1                   | NAG:58/BMA:6                   | NAG:11                 | NAG:52/BMA:7 | NAG:51/BMA:6 | NAG:50/BMA:7                       | NAG:51/BMA:6 | NAG:52/BMA:7          | NAG:51/BMA:6 | NAG:49/BMA:7                   | NAG:48/BMA:6 | NAG:47/BMA:7                   | NAG:51/BMA:6 |
| RMSD bond length (Å)/angles (°)              | 0.007/1.20                     | 0.007/1.23                     | 0.008/1.28             | 0.007/1.16   | 0.017/1.19   | 0.006/1.09                         | 0.007/1.16   | 0.007/1.13            | 0.009/1.41   | 0.012/1.37                     | 0.008/1.29   | 0.008/1.21                     | 0.008/1.33   |
| MolProbity score                             | 1.07                           | 1.38                           | 1.32                   | 1.53         | 1.20         | 1.39                               | 1.34         | 1.55                  | 1.21         | 1.63                           | 1.47         | 1.26                           | 1.56         |
| Clash score                                  | 2.83                           | 6.92                           | 2.76                   | 5.32         | 2.18         | 3.53                               | 4.15         | 5.83                  | 4.15         | 6.02                           | 5.75         | 2.69                           | 7.59         |
| Ramachandran outliers/allowed/favored (%)    | 0/1.03/98.97                   | 0/1.94/98.06                   | 0/3.82/96.18           | 0/3.64/96.36 | 0/3.32/96.68 | 0/3.60/96.37                       | 0/2.73/97.27 | 0/3.57/96.43          | 0/2.05/97.95 | 0.03/4.23/95.74                | 0/2.90/97.10 | 0.03/3.26/96.71                | 0/2.80/97.20 |
| Rotamer outliers (%)                         | 0                              | 0.13                           | 0                      | 0.04         | 0            | 0                                  | 0            | 0.14                  | 0            | 0.25                           | 0.11         | 0.16                           | 0.11         |
| Cβ outliers (%)                              | 0                              | 0.32                           | 0.63                   | 0            | 0.1          | 0                                  | 0            | 0                     | 0            | 0.14                           | 0.1          | 0.07                           | 0.3          |
| d FSC model (0.5; Å)                         | 3.3                            | 3.1                            | 3.9                    | 3.2          | 3.0          | 3.1                                | 3.0          | 3.1                   | 2.9          | 3.1                            | 2.9          | 3.1                            | 2.8          |
